# Supplementary figures and images for: Lanthanide heterometallic molecular squares Ru2–Ln2exhibiting sensitized near-infrared emission
Source: Royal Society of Chemistry journal article supplement (doi:10.1039/b403519d), 2004-01-01

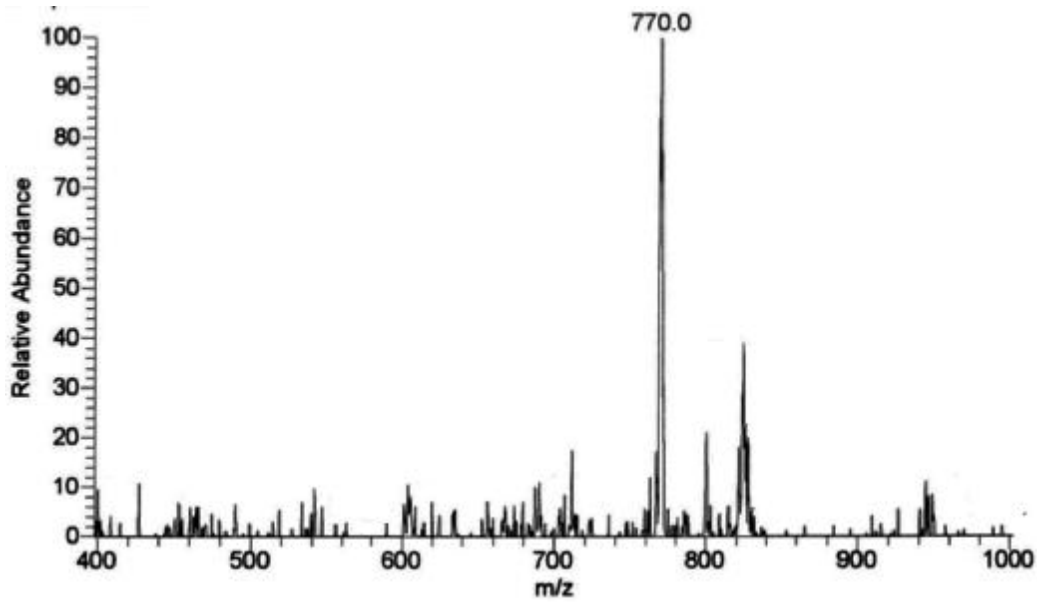

ESI-MS spectra of compound 1

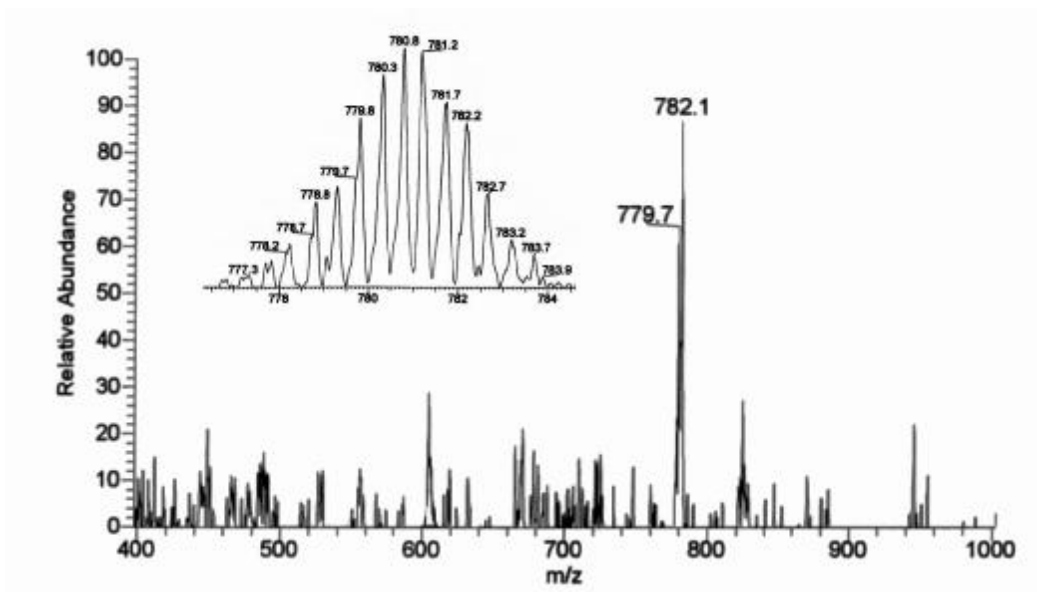

ESI-MS spectra of compound 2



Supplement: b403519d.pdf [file b403519d.pdf]
